# Supplementary material for: Low-melting mixtures based on choline ionic liquids
Source: Royal Society of Chemistry journal article supplement (doi:10.1039/c4cp02860k), 2014-01-01
Supplement: c4cp02860k1.pdf [file c4cp02860k1.pdf]

## Supporting information: Low-melting mixtures based on choline Ionic Liquids

Doris Rengstl,<sup>a</sup> Veronika Fischer<sup>a</sup> and Werner Kunz<sup>\*a</sup>

### Water content

The water content was determined with a coulometric Karl-Fischer titration using an Abimed MCI analyser (Model CA-02).

| Substance          | Water content in ppm |
|--------------------|----------------------|
| ChdiC <sub>4</sub> | 2221±100             |
| ChdiC <sub>5</sub> | 1521 ± 100           |
| ChdiC <sub>6</sub> | 3197±100             |
| LMM1               | 71 ± 100             |
| LMM1Urea           | 930 ± 80             |
| LMM2               | 519 ± 100            |
| LMM2Urea           | 714 ± 100            |

### Thermogravimetric analysis

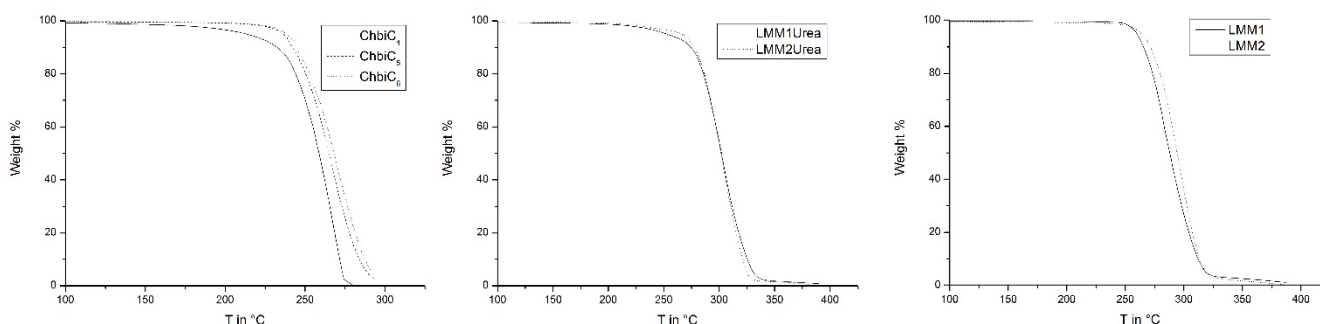

### Differential Scanning

### Calorimetry

Melting and crystallization enthalpies and entropies of choline succinate (ChdiC<sub>4</sub>), choline glutarate (ChdiC<sub>5</sub>) and choline adipate (ChdiC<sub>6</sub>) were obtained from DSC measurements in the temperature range from -80°C to 95°C. The numbers 1, 2 mark the transitions with increasing temperature (heating cycle) and the respective values at the cooling cycle.

|         | ChdiC <sub>4</sub>                     |                                                       |                                        |                                                       | ChdiC <sub>5</sub>                     |                                                       | ChdiC <sub>6</sub>                     |                                                       |
|---------|----------------------------------------|-------------------------------------------------------|----------------------------------------|-------------------------------------------------------|----------------------------------------|-------------------------------------------------------|----------------------------------------|-------------------------------------------------------|
|         | $\Delta H_1 /$<br>kJ mol <sup>-1</sup> | $\Delta S_1 /$<br>J mol <sup>-1</sup> K <sup>-1</sup> | $\Delta H_2 /$<br>kJ mol <sup>-1</sup> | $\Delta S_2 /$<br>J mol <sup>-1</sup> K <sup>-1</sup> | $\Delta H_1 /$<br>kJ mol <sup>-1</sup> | $\Delta S_1 /$<br>J mol <sup>-1</sup> K <sup>-1</sup> | $\Delta H_1 /$<br>kJ mol <sup>-1</sup> | $\Delta S_1 /$<br>J mol <sup>-1</sup> K <sup>-1</sup> |
| 1. heat |                                        |                                                       | 25.2                                   | 75.1                                                  | 24.0                                   | 76.7                                                  | 36.5                                   | 102.0                                                 |
| 1. cool |                                        |                                                       | -                                      | -                                                     | -                                      | -                                                     | -30.9                                  | -109.3                                                |
| 2. heat | -22.0                                  | -74.5                                                 | 23.3                                   | 69.7                                                  | -                                      | -                                                     | 35.6                                   | 99.1                                                  |
| 2. cool | -                                      | -                                                     | -                                      | -                                                     | -                                      | -                                                     | -30.2                                  | -105.4                                                |
| 3. heat | -21.7                                  | -73.1                                                 | 23.2                                   | 69.5                                                  | -                                      | -                                                     | 36.5                                   | 99.1                                                  |
| 3. cool | -                                      | -                                                     | -21.7                                  | -73.1                                                 | -                                      | -                                                     | -29.9                                  | -106.3                                                |

## Conductivity activation energies

Determination of activation energies of conductivity according to the Arrhenius ( $E_A$ ) and Vogel-Fulcher-Tammann model ( $E_{AVFT}$ ), respectively.

|          | Arrhenius model                     |                            | Vogel-Fulcher-Tammann model          |                                             |                     |
|----------|-------------------------------------|----------------------------|--------------------------------------|---------------------------------------------|---------------------|
|          | $\ln(\kappa_0 / \text{mS cm}^{-1})$ | $E_A / \text{kJ mol}^{-1}$ | $\kappa_0 / 10^3 \text{ mS cm}^{-1}$ | $E_{AVFT} / \text{kJ mol}^{-1} (\text{eV})$ | $T_{0K} / \text{K}$ |
| LMM1     | $18.4 \pm 0.4$                      | $56.0 \pm 1.1$             | $5 \pm 1$                            | $15.4 \pm 0.8$<br>( $0.16 \pm 0.01$ )       | $154 \pm 5$         |
| LMM1Urea | $18.7 \pm 0.4$                      | $56.5 \pm 1.2$             | $4 \pm 1$                            | $14.1 \pm 0.7$<br>( $0.15 \pm 0.01$ )       | $157 \pm 13$        |
| LMM2     | $18.2 \pm 1.0$                      | $55.6 \pm 2.8$             | $3 \pm 3$                            | $15 \pm 2$<br>( $0.15 \pm 0.02$ )           | $162 \pm 4$         |
| LMM2Urea | $18.6 \pm 0.4$                      | $56.6 \pm 1.2$             | $5 \pm 1$                            | $15.0 \pm 0.7$<br>( $0.16 \pm 0.01$ )       | $157 \pm 5$         |
